# Supplementary material for: How Fast Is the Sessile Ciona?
Source: Hindawi journal article supplement (doi:10.1155/2009/875901), 2009-01-01

Figure 1S

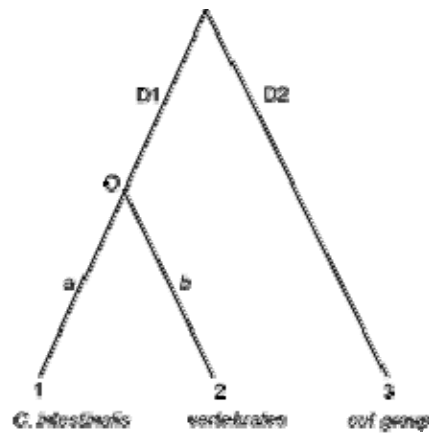

Supplement: f1 [file 875901.f1.pdf]
